# Supplementary material
Source: publisher figshare collection journal article supplement (https://gsajournals.figshare.com/ndownloader/files/12533207)
Supplement: Supplementary file 1 [file 12533207]

## Sheet: 133GenesMasterTable
Table S3. List of 133 genes for which RNAi depletion caused reproducible and elevated penetrance of sterility in glp-1(rf).
Gene names, WormBase ID, linkage groups, functional classes, mammalian orthologs, disease associations, membership in subsets of 56 and 77 genes, and phenotypic notes on the 133 genes identified in the primary screen.
Gene Symbol	WormBase ID	Linkage Group	Functional Class (manual)	Functional Class Notes	Mammalian Ortholog(s)	Mammalian Gene Description	Disease Association		Penetrant Sterility in glp-1(+) (77 genes)	Less Penetrant Steriity in glp-1(+) (56 genes)		>25% of gonad arms "loss of GSCs"; see also Fig 6A	Notes on progenitor pool (n = 10-30 gonad arms; qualitative scoring)
ant-1.1	WBGene00006439	III	mitochondrial		SLC25A6	ADP/ATP translocase 3; solute carrier family 25 member 6			y
atp-4	WBGene00020275	V	mitochondrial	H+ transporter	ATP5J	ATP synthase, H+ transporting, mitochondrial Fo complex subunit F6				y		n	"normal"
B0280.9	WBGene00015104	III	translation		UTP18	U3 small nucleolar RNA-associated protein 18 homolog				y		n	40% "normal", 50% reduced, 10% other
B0546.5	WBGene00015252	IV	unknown	DUF1182 Interpro family						y		y
bcas-2	WBGene00020441	III	RNA processing		BCAS2	Pre-mRNA-splicing factor SPF27				y		nd
bcat-1	WBGene00001149	X	metabolism		BCAT1	branched chain amino acid transaminase 1				y		n	65% "normal", 35% reduced
C03D6.1	WBGene00007275	I	RNA silencing		members of the Argonaute/PIWI family incl. AGO4					y		y
C23G10.8	WBGene00016015	III	unknown	DUF1182 Interpro family					y
C27C12.3	WBGene00007773	X	unknown	No recognizable Pfam domains						y		n	50% "normal", 50% reduced
C53A5.6	WBGene00008266	V	other	protein-protein interaction domains	IPP	Isoform 1 of Actin-binding protein: intracisternal A particle-promoted polypeptide			y
cacn-1	WBGene00012230	II	other	many functions	CACTIN	cactin, spliceosome C complex subunit				y		y
cbp-1	WBGene00000366	III	transcription		CREBBP	CREBBP variant protein	Colorectal cancer; Rubinstein-Taybi Syndrome		y
ccdc-55	WBGene00007627	III	RNA processing		NSRP1	nuclear speckle splicing regulatory protein 1			y
cct-2	WBGene00000378	II	proteostasis	protein folding	CCT2	chaperonin containing TCP1 subunit 2			y
cdc-5L	WBGene00008386	I	other	other	cdc5L	cell division cycle 5 like			y
cgh-1	WBGene00000479	III	other	translation	DDX6	Probable ATP-dependent RNA helicase DDX6				y		n	"normal"
chc-1	WBGene00011867	III	transport		CLTC	Clathrin Heavy Chain				y		nd
cks-1	WBGene00001051	IV	cell division		CKS1B	CDC28 protein kinase regulatory subunit 1B				y		n	"normal"
copd-1	WBGene00015734	III	transport		ARCN1	Coatomer subunit delta; archain 1			y
cyb-3	WBGene00000868	V	cell division		CCNB3	Isoform 1 of G2/mitotic-specific cyclin-B3				y		n	"normal"
cye-1	WBGene00000871	I	cell division		CCNE	Isoform E1L of G1/S-specific cyclin-E1				y		y
cyn-12	WBGene00000888	IV	other		PPIL1	peptidylprolyl cis-trans isomerase like 1			y
cyn-4	WBGene00000880	II	other		PPIL2	peptidylprolyl isomerase like 2			y
dars-1	WBGene00001094	III	translation	tRNA synthetase	DARS	aspartate--tRNA ligase, cytoplasmic isoform 1			y
dic-1	WBGene00000994	IV	mitochondrial	mitochondrial membrane morphology	INTS6	integrator complex subunit 6			y
dld-1	WBGene00010794	IV	metabolism		DLD	dihydrolipoyl dehydrogenase, mitochondrial isoform 1 precursor	Maple syrup urine disease		y
drd-1	WBGene00009902	II	metabolism		FAXDC2	fatty acid hydroxylase domain containing 2			y
dyci-1	WBGene00015927	IV	structural		DYNC1I1	cytoplasmic dynein 1 intermediate chain 1 isoform b				y		y
E03H4.8	WBGene00008476	I	transport		COPB2	coatomer protein complex subunit beta 2			y
eef-1G	WBGene00008920	V	translation		EEF1G	eukaryotic translation elongation factor 1 gamma			y
egg-3	WBGene00009701	II	signaling		PTPN9	protein tyrosine phosphatase, non-receptor type 9			y
egl-45	WBGene00001209	III	translation		EIF3A	eukaryotic translation initiation factor 3 subunit A			y
eif-6	WBGene00001234	I	translation		eIF6	anti-association factor eIF6; eukaryotic translation initiation factor				y		y
emb-27	WBGene00001281	II	cell division		CDC16	cell division cycle 16; anaphase promoting complex subunit APC6				y		y
emb-5	WBGene00001259	III	transcription		SUPT6H	Isoform 1 of Transcription elongation factor SPT6; SPT6 homolog, histone chaperone			y
emb-8	WBGene00001262	III	metabolism		POR	NADPH cytochrome P450 oxidoreductase	Antley-Bixler Syndrome			y		nd
exos-3	WBGene00010325	I	transport		EXOSC3	exosome component 3	Pontocerebellar hypoplasia type 1B			y		y
exos-9	WBGene00018154	III	transport		EXOSC9	Isoform 1 of Exosome complex component RRP45			y
F07G11.4	WBGene00017231	V	unknown	Pfam Glycosyltransferase family 92 domain					y
F16D3.6	WBGene00008889	I	unknown	DUF1182 Interpro family						y		y
F25B4.7	WBGene00017770	V	transport		SLC25A6	ADP/ATP translocase 3; solute carrier family 25 member 6				y		y
F31F6.1	WBGene00009300	X	unknown	paralog of C27C12.3						y		n	50% "normal", 50% reduced
F31F6.2	WBGene00009301	X	unknown	paralog of C27C12.3						y		n	50% "normal", 50% reduced
F31F6.3	WBGene00009302	X	unknown	paralog of C27C12.3						y		n	50% "normal", 50% reduced
F35E2.1	WBGene00009409	I	unknown	DUF1182 Interpro family						y		y
F46C5.6	WBGene00009781	II	signaling		PPP4R4	Isoform 1 of Serine/threonine-protein phosphatase 4 regulatory subunit 4				y		n	"normal"
F53F4.11	WBGene00009993	V	other		RSL1D1	ribosomal L1 domain containing 1				y		n	"normal"
glp-4	WBGene00006936	I	translation	tRNA synthetase	VRS	Isoform 1 of Valyl-tRNA synthetase, mitochondrial			y
grl-4	WBGene00001713	IV	signaling	Hh associated					y
gsk-3	WBGene00001746	I	signaling		GSK3A	glycogen synthase kinase 3 alpha				y		y
hsp-1	WBGene00002005	IV	proteostasis	protein folding	HSPA1L	heat shock protein family A (Hsp70) member 1 like			y
iff-1	WBGene00002064	III	translation		EIF5A	Isoform 2 of Eukaryotic translation initiation factor 5A-1				y		n	"normal"
iftb-1/ eif-2beta	WBGene00010560	I	translation		eIF2beta	eukaryotic initiation factor-2 beta				y		nd
K07C5.12	WBGene00045134	V	translation	predicted snoRNA					y
K07C5.4	WBGene00010627	V	translation	ribonucleo-protein	NOP56	NOP56 ribonucleoprotein	Spinocerebellar ataxia type 36		y
K08D12.3	WBGene00019537	IV	transcription		CNBP	CCHC-type zinc finger nucleic acid binding protein	Myotonic dystrophy type 2		y
K08E5.1a	WBGene00014801	V	unknown	non-coding transcript						y		n	"normal"
let-858	WBGene00002957	II	RNA processing		CWC22	Pre-mRNA splicing factor CWC22, spliceosome associated protein homolog			y
lin-39	WBGene00003024	III	transcription		HOXA5	Homeobox protein Hox-A5				y		nd
mcm-6	WBGene00003158	III	replication		MCM6	DNA replication licensing minichromosome maintenance complex component 6	Lactose intolerance		y
mcm-7	WBGene00003159	V	replication		MCM7	Isoform 1 of DNA replication licensing minichromosome maintenance complex component 7				y		n	"normal"
mdt-6	WBGene00003164	V	transcription		MED6	mediator complex subunit 6			y
mig-38	WBGene00009587	IV	metabolism						y
mma-1	WBGene00007587	V	mitochondrial		LRPPRC	leucine rich pentatricopeptide repeat containing				y		y
mrpl-1	WBGene00017997	IV	mitochondrial	mitochondrial ribosomal protein		WB says mRpL1 but no protein seq match!			y
mrpl-4	WBGene00020717	V	mitochondrial	mitochondrial ribosomal protein	MRPL4	mitochondrial ribosomal protein L4				y		y
mrps-22	WBGene00007564	II	mitochondrial	mitochondrial ribosomal protein	MRPS22	mitochondrial ribosomal protein S22	Combined oxidative phosphorylation deficiency		y
mrps-30	WBGene00044321	I	mitochondrial	mitochondrial ribosomal protein	mRpS30	28S ribosomal protein S30, mitochondrial			y
mua-3	WBGene00003482	III	structural		MATN2	Isoform 2 of Matrilin-2	Distal arthrogryposis; Marfan syndrome; Weill-Marchesani syndrome		y
nog-1	WBGene00020297	IV	translation	ribosome biogenesis	GTPBP4	Nucleolar GTP binding protein 1; GTP binding protein 4	Diamond-Blackfan anemia		y
npp-20	WBGene00003806	IV	transport		SEC13	SEC13 homolog, nuclear pore and COPII coat complex component				y		y
npp-3	WBGene00003789	II	structural		NUP205	Nuclear Pore complex Protein Nup205			y
npp-8	WBGene00003794	IV	structural			only 25% similarity to human Nup155 (nucleoporin 155)	Familial atrial fibrillation		y
nuo-4	WBGene00019401	III	metabolism		NDUFA10	NADH:ubiquinone oxidoreductase subunit A10			y
nxt-1	WBGene00003836	I	transport		NXT2	nuclear transport factor 2 like export factor 2				y		y
pafo-1	WBGene00008338	V	transcription		PAF1	PAF1 homolog, Paf1/RNA polymerase II complex component			y
par-5	WBGene00003920	IV	signaling	Wnt, MAPK associated		14-3-3 protein zeta/delta; tyrosine 3-monooxygenase/tryptophan 5-monooxygenase activation protein zeta			y
pars-1	WBGene00004189	III	translation	tRNA synthetase	EPRS	glutamyl-prolyl-tRNA synthetase			y
pas-5	WBGene00003926	I	proteostasis	protein degradation	PSMA5	proteasome (prosome, macropain) subunit, alpha type, 5			y
pqn-48	WBGene00004135	II	other		IFI30	Gamma-interferon-inducible lysosomal thiol reductase				y		y
pri-1	WBGene00004180	III	replication		PRIM1	DNA primase small subunit 1			y
prp-21	WBGene00004188	II	RNA processing		SF3A1	Splicing factor 3A subunit 1			y
prp-38	WBGene00008380	V	RNA processing		PRPF38A	Isoform 1 of pre-mRNA splicing factor 38A			y
prp-4	WBGene00007972	I	RNA processing		PRPF4	pre-mRNA processing factor 4	Retinitis pigmentosa			y		n	100% other
rla-0	WBGene00004408	I	translation	ribosomal protein	RPLP0	ribosomal protein, large, P0			y
rpa-1	WBGene00017546	II	replication		RPA1	Replication protein A 70 kDa DNA-binding subunit			y
rpc-1	WBGene00004411	IV	transcription		POLR3A	DNA-directed RNA polymerase III subunit A	Hypomyelinating leukodystrophy 7 with or without oligodontia and-or hypogonadotropic hypogonadism		y
rpl-2	WBGene00004413	V	translation	ribosomal protein	RPL8	60S ribosomal protein L8				y		n	75% reduced
rpl-24.2	WBGene00004437	I	translation	ribosomal protein	RSL24D1	ribosomal L24 domain containing 1				y		y
rpl-26	WBGene00004440	II	translation	ribosomal protein	RPL26	60S ribosomal protein L26			y
rpl-3	WBGene00004414	III	translation	ribosomal protein	RPL3	Ribosomal Protein L3, isoform CRA_b			y
rpl-35	WBGene00004449	III	translation	ribosomal protein	RPL35	ribosomal protein L35			y
rps-11	WBGene00004480	IV	translation	ribosomal protein	RPS11	ribosomal protein S11				y		n	"normal"
rps-13	WBGene00004482	III	translation	ribosomal protein	RPS13	40S ribosomal protein S13			y
rps-16	WBGene00004485	V	translation	ribosomal protein	RPS16	ribosomal protein S16			y
rps-23	WBGene00004492	IV	translation	ribosomal protein	RPS23	ribosomal protein S23				y		y
rps-24	WBGene00004493	IV	translation	ribosomal protein	RPS24	Isoform 3 of 40S ribosomal protein S24	Diamond-Blackfan anemia		y
rps-28	WBGene00004497	IV	translation	ribosomal protein	RPS28	ribosomal protein S28			y
rps-8	WBGene00004477	IV	translation	ribosomal protein	RPS8	40S ribosomal protein S8				y		y
rrbs-1	WBGene00007617	V	translation	ribosome biogenesis	RRS1	ribosome biogenesis regulator homolog			y
ruvb-1	WBGene00007784	V	translation		RUVBL1	RuvB like AAA ATPase 1			y
sec-23	WBGene00004754	V	transport		SEC23A	Sec23 homolog A, coat complex II component			y
skn-1	WBGene00004804	IV	transcription		NFE2L3	nuclear factor, erythroid 2 like 3; Nrf3				y		n	"normal"
sly-1	WBGene00009654	III	transport		SCFD1	Sec1 family domain-containing protein 1			y
sop-3	WBGene00004946	I	signaling	Wnt associated						y		y
spt-16	WBGene00018849	I	other	transcription	SUPT16H	SPT16 FACT (Facilitates Chromatin Transcription) complex subunit			y
sptf-3	WBGene00012735	I	transcription			transcription factor Sp3 isoform 3			y
srh-292	WBGene00005496	V	signaling	7 transmembrane GPCR, Serpentine Receptor, class H					y
stt-3	WBGene00020437	III	metabolism		STT3B	Dolichyl-diphosphooligosaccharide--protein glycosyltransferase subunit STT3B	Congenital disorder of glycosylation type I			y		n	"normal"
syp-3	WBGene00006377	I	cell division						y
T01C3.13	WBGene00200666	V	unknown	predicted non-coding RNA					y
T08D2.8	WBGene00011613	X	structural		CKAP5	cytoskeleton associated protein 5			y
T12E12.1	WBGene00020462	IV	proteostasis	protein degradation	ARIH2	ariadne RBR E3 ubiquitin protein ligase 2				y		nd
T26G10.1	WBGene00012059	III	other	translation	DDX47	Probable ATP-dependent RNA helicase DDX47			y
tads-1	WBGene00007217	I	replication		RTFDC1	replication termination factor 2 domain containing 1			y
teg-4	WBGene00019323	I	RNA processing		SF3B3	human splicing factor 3b, subunit 3				y		y
trd-1	WBGene00020600	III	other		TTC27	tetratricopeptide repeat protein 27 isoform 2			y
tsfm-1	WBGene00010094	V	mitochondrial	translation	TSFM	Ts translation elongation factor, mitochondrial	Combined oxidative phosphorylation deficiency			y		n	"normal"
twk-43	WBGene00006693	V	transport		KCNK18	TWiK family of potassium channels)				y		n	"normal"
uaf-2	WBGene00006698	IV	RNA processing		U2AF1	U2 small nuclear RNA auxiliary factor 1				y		n	"normal"
ubq-2	WBGene00006728	III	proteostasis	ribosomal subunit/protein degradation	UBA52	Ubiquitin-60S ribosomal protein L40; ubiquitin A-52 residue ribosomal protein fusion product 1				y		nd
unc-45	WBGene00006781	III	proteostasis	protein folding	UNC45A	unc-45 myosin chaperone A	Cataract 43		y
usp-39	WBGene00017280	II	proteostasis	protein degradation	USP39	ubiquitin specific peptidase 39			y
vap-1	WBGene00006886	X	other		CRISP2	cysteine rich secretory protein 2				y		y
vha-1	WBGene00006910	III	transport		ATP6V0C	V-type proton ATPase 16 kDa proteolipid subunit; ATPase H+ transporting V0 subunit c			y
wrt-1	WBGene00006947	II	signaling	Hh associated	DHH	Desert hedgehog				y		y
xpo-2	WBGene00002079	I	transport		CSE1L	chromosome segregation 1 like			y
Y18D10A.16	WBGene00012483	I	mitochondrial		COA5	cytochrome c oxidase assembly factor 5			y
Y37A1A.3	WBGene00012536	IV	transport		SLC2A9	Isoform 1 of Solute carrier family 2, facilitated glucose transporter member 9				y		n	"normal"
Y39B6A.33	WBGene00012692	V	translation		NOP53	NOP53 ribosome biogenesis factor			y
Y57E12AL.6	WBGene00021959	V	proteostasis	protein degradation	POMP	proteasome maturation protein			y
Y61A9LA.10	WBGene00022021	V	translation		BMS1	ribosome biogenesis factor			y
Y82E9BR.3	WBGene00022336	III	mitochondrial		ATP5G1	ATP synthase, H+ transporting, mitochondrial Fo complex subunit C1 (subunit 9)				y		nd
NOTES
*nd = not determined
